# Supplementary material for: Integrated Network Pharmacology and Experimental Validation Approach to Investigate the Therapeutic Effects of Capsaicin on Lipopolysaccharide-Induced Acute Lung Injury
Source: Hindawi journal article supplement (doi:10.1155/2022/9272896), 2022-01-30
Supplement: f1 [file 9272896.f1.pdf]

**Table S1.** Sequences of primers used quantitative real-time PCR.

| Gene   | Forward primer (5' to 3')   | Reverse primer (5' to 3')     |
|--------|-----------------------------|-------------------------------|
| NF-κB  | GCAACTCTGTCCTGCACCTA        | CTGCTCCTGAGCGTTGACTT          |
| CXCL1  | GCTTGAAGGTGTTGCCCTCAG       | AGAAGC CAGCGTTCACCAGAC        |
| IL6    | TCCTACCCCAACTTCCAATGCTC     | TTGGATGGTCTTGGTCCTTAGCC       |
| TNF    | ATGGCATGGATCTCAAAGAC        | CGGACTCCGTGATGTCTAAG          |
| CXCL2  | TCCTCAATGCTGTACTGGTCC       | ATGTTCTTCCTTTCCAGGTC          |
| CXCL10 | TCTCTCCACCTCCCTTTACCC       | CTTGTCATCACGCTGTAGT           |
| GAPDH  | CTGACGAAGGACAATGAGTGACAGCGC | ATTCCACATCACAAAGACTTCGCTCAGCC |

**Table S2.** Results of KEGG enrichment analysis.

| Pathways                                             | enrichment | pvalue      | count | Genes                                                                                                                                                                                                                                                                                                                       |
|------------------------------------------------------|------------|-------------|-------|-----------------------------------------------------------------------------------------------------------------------------------------------------------------------------------------------------------------------------------------------------------------------------------------------------------------------------|
| Pathways in cancer                                   | 0.07088608 | 3.32866E-39 | 28    | AGTR1, AKT1, BDKRB1, BDKRB2, CTNNB1, EGF, EGFR, FOS, HRAS, HSP90AA1, IGF1, IL6, CXCL8, JAK1, JUN, NFKB1, PIK3CA, PIK3R1, MAPK1, MAPK3, MAPK8, RELA, RXRA, STAT1, STAT3, TP53, VEGFA, CXCR4                                                                                                                                  |
| AGE-RAGE signaling pathway in diabetic complications | 0.19191919 | 1.05058E-34 | 49    | AGTR1, AKT1, MAPK14, EDN1, HRAS, IL6, CXCL8, JUN, NFKB1, PIK3CA, PIK3R1, MAPK1, MAPK3, MAPK8, RELA, STAT1, STAT3, TNF, VEGFA, CTNNB1, EGF, EGFR, CXCL10, JAK1, RXRA, TP53, FOS, SRC, STAT6, IL2, CXCL1, CXCL2, CCL20, BDKRB2, KNG1, HSP90AA1, POMC, ESR1, BDKRB1, CNR1, OPRM1, CXCR4, IGF1, F2, CCL19, CHRM2, GCG, NPY, SST |
| Hepatitis C                                          | 0.12426036 | 3.53551E-34 | 21    | AKT1, MAPK14, CTNNB1, EGF, EGFR, HRAS, CXCL8, CXCL10, JAK1, NFKB1, PIK3CA, PIK3R1, MAPK1, MAPK3, MAPK8, RELA, RXRA, STAT1, STAT3, TNF, TP53                                                                                                                                                                                 |

|                                           |            |             |    |                                                                                                                                       |
|-------------------------------------------|------------|-------------|----|---------------------------------------------------------------------------------------------------------------------------------------|
| Hepatitis B                               | 0.11864407 | 9.84786E-34 | 21 | AKT1, MAPK14, FOS, HRAS, IL6, CXCL8, JAK1, JUN, NFKB1, PIK3CA, PIK3R1, MAPK1, MAPK3, MAPK8, RELA, SRC, STAT1, STAT3, STAT6, TNF, TP53 |
| TNF signaling pathway                     | 0.16666667 | 1.18443E-31 | 18 | AKT1, MAPK14, EDN1, FOS, CXCL1, CXCL2, IL6, CXCL10, JUN, NFKB1, PIK3CA, PIK3R1, MAPK1, MAPK3, MAPK8, RELA, CCL20, TNF                 |
| Chagas disease (American trypanosomiasis) | 0.1588785  | 1.67894E-29 | 17 | AKT1, BDKRB2, MAPK14, FOS, IL2, IL6, CXCL8, JUN, KNG1, NFKB1, PIK3CA, PIK3R1, MAPK1, MAPK3, MAPK8, RELA, TNF                          |
| Pancreatic cancer                         | 0.234375   | 8.01573E-29 | 15 | AKT1, EGF, EGFR, JAK1, NFKB1, PIK3CA, PIK3R1, MAPK1, MAPK3, MAPK8, RELA, STAT1, STAT3, TP53, VEGFA                                    |
| IL-17 signaling pathway                   | 0.17204301 | 2.30815E-28 | 16 | MAPK14, FOS, CXCL1, CXCL2, HSP90AA1, IL6, CXCL8, CXCL10, JUN, NFKB1, MAPK1, MAPK3, MAPK8, RELA, CCL20, TNF                            |
| Prolactin signaling pathway               | 0.21428571 | 3.60007E-28 | 15 | AKT1, MAPK14, ESR1, FOS, HRAS, NFKB1, PIK3CA, PIK3R1, MAPK1, MAPK3, MAPK8, RELA, SRC, STAT1, STAT3                                    |
| Toll-like receptor signaling pathway      | 0.15384615 | 1.58846E-27 | 16 | AKT1, MAPK14, FOS, IL6, CXCL8, CXCL10, JUN, NFKB1, PIK3CA, PIK3R1, MAPK1, MAPK3, MAPK8, RELA, STAT1, TNF                              |

---
